# Supplementary material for: Embedding of HIV Egress within Cortical F-Actin
Source: MDPI journal article supplement (doi:10.3390/pathogens11010056), 2022-01-03
Supplement: s1 [file s1]

## Supplementary tables

| Short-Filopodia<br>(Diaph <sup>-ve</sup> ) |       | Lamellipodia<br>(Diaph <sup>-ve</sup> Arp2/3 <sup>-ve</sup> ) |       |
|--------------------------------------------|-------|---------------------------------------------------------------|-------|
| Tip vs PM <sup>1</sup>                     | 0.028 | Ridge vs PM                                                   | 0.121 |
| Tip vs shaft                               | 0.026 | Ridge vs face                                                 | 0.13  |
| Tip vs base                                | 0.022 | Ridge vs base                                                 | 0.124 |
| Shaft vs PM                                | 0.539 | Face vs PM                                                    | 0.91  |
| Base vs PM                                 | 0.153 | Base vs PM                                                    | 0.975 |
| Base vs shaft                              | 0.513 | Base vs face                                                  | 0.94  |

<sup>1</sup>PM = Plasma membrane

Table S1. Statistical summary of HIV bud frequencies

Table S2.

Plasmid constructs generated and used in this study

| Plasmids                  | Description                                                                                                               |
|---------------------------|---------------------------------------------------------------------------------------------------------------------------|
| HIViGFP                   | HIV carrying eGFP between MA and CA domains of Gag                                                                        |
| HIViGFP <sup>ENV-ve</sup> | HIV carrying eGFP between MA and CA domains of Gag but lacking a functional ENV due to presence of stop codons in ENV ORF |
| HIV <sup>NC-ve</sup>      | HIViGFP Gag mutant wherein the NC domain has been replaced with Leucine zipper domain of yeast transcription factor GCN4  |
| HIV <sup>CA7576AA</sup>   | HIViGFP Gag mutant carrying point mutations EE7576AA in the CA domain of Gag                                              |
| HIV <sup>CA99A</sup>      | HIViGFP Gag mutant carrying point mutations P99A in the CA domain of Gag                                                  |
| HIV <sup>p6-ve</sup>      | HIViGFP Gag mutant with deleted p6 domain                                                                                 |
| pHIVNL43IRESeGFP          | HIV NL34 expressing eGFP in the Nef ORF followed by an IRES element and an intact HIV Nef ORF.                            |
| pLVXdeltaDADmcherry       | Lentiviral plasmid expressing the constitutively active form of Diaph2                                                    |

Table S3. shRNA sequences used in this study

| Name  | Target sequence     | Sequence ID | Source            |
|-------|---------------------|-------------|-------------------|
| Arp2a | GTGGGTAAATCTGAGTTTA | N/A         | Gomez et al; 2007 |

|          |                       |                |                      |
|----------|-----------------------|----------------|----------------------|
| Arp2b    | CTGTGTTACGTGGGATATA   | N/A            | Gomez et al; 2007    |
| Arp3a    | GAAGAGAGCGAAAGTGATT   | N/A            | Gomez et al; 2007    |
| Arp3b    | GAGCAAGTGATCTTTAAATA  | N/A            | Gomez et al; 2007    |
| Diaph1_1 | GCATGCCCTATCAAGAGATTA | TRCN0000118681 | TRC, Broad Institute |
| Diaph1_2 | GCCTCCTTATTGGACATTCTT | TRCN0000118679 | TRC, Broad Institute |
| Diaph3_1 | CCAGATTTGTTATCAGTGCAA | TRCN0000152084 | TRC, Broad Institute |
| Diaph3_2 | GCATGACAAGTTTGTGACAAA | TRCN0000150850 | TRC, Broad Institute |
| Diaph2_1 | GCATCAATGGAACAACAAAtt | sc-35192-SHA   | Santa Cruz           |
| Diaph2_2 | GGAACGTGACATCAAGAAAtt | sc-35192-SHB   | Santa Cruz           |
| Diaph2_3 | GGAATCCAGTGGTAAATCAtt | sc-35192-SHC   | Santa Cruz           |
| FMNL1_1  | CCCTCTTTAGCCGCTTCATTA | TRCN0000008289 | TRC, Broad Institute |
| FMNL1_2  | GAGCGGTTTCAAGTCAAGAAT | TRCN0000008287 | TRC, Broad Institute |
| RAC1_1   | CCCTACTGTCTTTGACAATTA | TRCN0000004873 | TRC, Broad Institute |
| RAC1_2   | CGCAAACAGATGTGTTCTTAA | TRCN0000004871 | TRC, Broad Institute |
| IQGAP1_1 | GCCCACATTGTGCCTTTATTT | TRCN0000047483 | TRC, Broad Institute |
| IQGAP1_2 | GCATCCACTTACCAGGATATA | TRCN0000047487 | TRC, Broad Institute |

Table S4. CRISPR gRNA used in this study

| Name                    | gRNA sequence (5'-3') with <u>target region</u> | Target gene (NCBI GeneID) |
|-------------------------|-------------------------------------------------|---------------------------|
| Diaph2 gRNA<br>_Oligo 1 | caccgGAACCGGGCCGCCAATGAAG                       | Diaph2 (Gene ID: 1730)    |
| Diaph2 gRNA<br>_Oligo2  | aaacCTTCATTGGCGGCCCGGTTCc                       | "_"                       |
| Diaph2 Surveyor<br>Fwd  | CCCGAGGTGCTTTCTCAGTT                            | "_"                       |
| Diaph2 Surveyor<br>Rvs  | GGTTTGCGCCCACAAGTTAG                            | "_"                       |
| Cdc42 gRNA<br>_Oligo 1  | caccgGACAGTCGGTACATATTCCGA                      | Cdc42 (Gene ID: 998)      |
| Cdc42 gRNA<br>_Oligo2   | aaacTCGGAATATGTACCGACTGTCc                      | "_"                       |
| Cdc42 Surveyor<br>Fwd   | TTGCTCTGAGTGCCTGAACC                            | "_"                       |
| Cdc42 Surveyor<br>Rvs   | AGTTTTGCCTCCCAGCACTT                            | "_"                       |
| IQGAP1 gRNA<br>_Oligo 1 | caccgGTGGGGTCTACCTTGCCAAAC                      | IQGAP1 (Gene ID:8826)     |
| IQGAP1 gRNA<br>_Oligo2  | aaacGTTTGGCAAGGTAGACCCCAc                       | "_"                       |
| IQGAP1<br>Surveyor Fwd  | CCTCTCTCCTTTGGTGCAGG                            | "_"                       |
| IQGAP1<br>Surveyor Rvs  | GAGGCGGGCTTTCCAGATAA                            | "_"                       |
| Rac1 gRNA<br>_Oligo 1   | caccgGTGGTTGTGTAAGTATCAGT                       | Rac1 (Gene ID:5879)       |
| Rac1 gRNA<br>_Oligo2    | aaacACTGATCAGTTACACAACCACc                      | "_"                       |
| Rac1 Surveyor<br>Fwd    | GGTACCAATGTGTATGTGGTGA                          | "_"                       |
| Rac1 Surveyor<br>Rvs    | CCTCACAGACAGTTAAAGTTTGC                         | "_"                       |
| WAVE2 gRNA<br>_Oligo 1  | caccgGTGAGAGGGTCGACCGACTAC                      | WAVE2 (GeneID:10163)      |
| WAVE2 gRNA<br>_Oligo2   | aaacGTAGTCGGTCGACCCTCTCACc                      | "_"                       |
| WAVE2 Surveyor<br>Fwd   | GCAGTCATCTGCATATAGCCCA                          | "_"                       |
| WAVE2 Surveyor<br>Rvs   | GCTCAGCAGAGCCTGCAAAT                            | "_"                       |

Table S5. List of selected proteins detected in virion preparations from Diaph2<sup>+ve</sup>Arp<sup>+ve</sup> Diaph2<sup>-ve</sup>Arp<sup>+ve</sup> cells and Diaph2<sup>-ve</sup>Arp<sup>-ve</sup> cells.

| Protein name <sup>1</sup>                   | Gene name | Function              | Mol Wt (kDa) | Number of peptides <sup>2</sup>                |                                                |                                                |
|---------------------------------------------|-----------|-----------------------|--------------|------------------------------------------------|------------------------------------------------|------------------------------------------------|
|                                             |           |                       |              | Diaph2 <sup>+ve</sup> Arp <sup>+ve</sup> cells | Diaph2 <sup>-ve</sup> Arp <sup>+ve</sup> cells | Diaph2 <sup>-ve</sup> Arp <sup>-ve</sup> cells |
| Cadherin-2                                  | CDH2      | Cell to cell adhesion | 99.809       | 2                                              | 2                                              | 0                                              |
| Cadherin-6                                  | CDH6      | Cell to cell adhesion | 88.309       | 4                                              | 1                                              | 1                                              |
| Cadherin-13                                 | CDH13     | Cell to cell adhesion | 78.287       | 3                                              | 3                                              | 2                                              |
| Integrin alpha-X (CD11c)                    | ITGAX     | Cell to cell adhesion | 127.829      | 4                                              | 4                                              | 0                                              |
| Integrin alpha-M                            | ITGAM     | Cell to cell adhesion | 127.179      | 9                                              | 7                                              | 12                                             |
| Integrin alpha-L (CD11a)                    | ITGAL     | Cell to cell adhesion | 128.77       | 6                                              | 4                                              | 5                                              |
| Integrin alpha-4                            | ITGA4     | Cell to cell adhesion | 114.90       | 6                                              | 7                                              | 1                                              |
| Integrin beta                               | ITGB1     | Cell to cell adhesion | 88.41        | 10                                             | 17                                             | 9                                              |
| Integrin alpha-5                            | ITGA5     | Cell to cell adhesion | 114.536      | 9                                              | 6                                              | 11                                             |
| Integrin alpha-6                            | ITGA6     | Cell to cell adhesion | 126.60       | 9                                              | 8                                              | 9                                              |
| CD44 antigen                                | CD44      | Cell to cell adhesion | 81.538       | 8                                              | 7                                              | 4                                              |
| CD97 antigen                                | CD97      | Cell to cell adhesion | 91.868       | 7                                              | 5                                              | 0                                              |
| Intercellular adhesion molecule 1           | ICAM1     | Cell to cell adhesion | 57.825       | 7                                              | 5                                              | 5                                              |
| Platelet endothelial cell adhesion molecule | PECAM1    | Cell to cell adhesion | 82.522       | 13                                             | 13                                             | 2                                              |

| Protein name <sup>1</sup>                   | Gene name | Function                                                | Mol Wt (kDa) | Number of peptides <sup>2</sup>                  |                                                 |                                                |
|---------------------------------------------|-----------|---------------------------------------------------------|--------------|--------------------------------------------------|-------------------------------------------------|------------------------------------------------|
|                                             |           |                                                         |              | Diaph2 <sup>+/ve</sup> Arp <sup>+/ve</sup> cells | Diaph2 <sup>-/-</sup> Arp <sup>+/ve</sup> cells | Diaph2 <sup>-/-</sup> Arp <sup>-/-</sup> cells |
| C-type lectin domain family 2 member B      | CLEC2B    | Cell to cell adhesion                                   | 17.307       | 3                                                | 3                                               | 2                                              |
| Ezrin                                       | EZR       | Connects actin cytoskeleton to PM                       | 69.413       | 4                                                | 1                                               | 1                                              |
| Talin-1                                     | TLN1      | Links integrins to actin cytoskeleton                   | 269.967      | 22                                               | 13                                              | 12                                             |
| Alpha-actinin-1                             | ACTN1     | Connects actin cytoskeleton to intracellular structures | 103.058      | 7                                                | 7                                               | 6                                              |
| FilaminA                                    | FLNA      | Links actin to TM proteins                              | 280.739      | 11                                               | 9                                               | 13                                             |
| Moesin                                      | MSN       | Connects actin cytoskeleton to PM                       | 67.82        | 32                                               | 20                                              | 38                                             |
| Vinculin                                    | VCL       | Links integrins to actin cytoskeleton                   | 123.799      | 36                                               | 31                                              | 23                                             |
| Actin-related protein 2/3 complex subunit 3 | ARPC3     | Actin nucleation                                        | 20.547       | 2                                                | 3                                               | 0                                              |

| Protein name <sup>1</sup>                   | Gene name | Function         | Mol Wt (kDa) | Number of peptides <sup>2</sup>                  |                                                 |                                                |
|---------------------------------------------|-----------|------------------|--------------|--------------------------------------------------|-------------------------------------------------|------------------------------------------------|
|                                             |           |                  |              | Diaph2 <sup>+/ve</sup> Arp <sup>+/ve</sup> cells | Diaph2 <sup>-/-</sup> Arp <sup>+/ve</sup> cells | Diaph2 <sup>-/-</sup> Arp <sup>-/-</sup> cells |
| Actin-related protein 2/3 complex subunit 2 | ARPC2     | Actin nucleation | 34.333       | 2                                                | 3                                               | 0                                              |
| Actin related protein 2                     | ACTR2     | Actin nucleation | 44.761       | 7                                                | 5                                               | 1                                              |
| F-actin-capping protein subunit beta        | CAPZB     | Actin regulation | 31.35        | 4                                                | 4                                               | 2                                              |
| F-actin-capping protein subunit alpha-1     | CAPZA1    | Actin regulation | 32.923       | 4                                                | 5                                               | 0                                              |
| Profilin 1                                  | PFN1      | Actin regulation | 15.054       | 9                                                | 7                                               | 6                                              |
| Macrophage -capping protein                 | CAPG      | Actin regulation | 36.857       | 11                                               | 11                                              | 7                                              |
| Ras GTPase-activating-like protein IQGAP1   | IQGAP1    | Actin regulation | 189.252      | 17                                               | 15                                              | 13                                             |
| Cell division control protein 42 homolog    | CDC42     | Actin regulation | 21.258       | 2                                                | 3                                               | 4                                              |
| Ras-related C3 botulinum toxin substrate 1  | RAC1      | Actin regulation | 21.45        | 2                                                | 2                                               | 2                                              |
| Transformin g protein RhoA                  | RHOA      | Actin regulation | 21.768       | 3                                                | 3                                               | 2                                              |

| Protein name <sup>1</sup>        | Gene name | Function                 | Mol Wt (kDa) | Number of peptides <sup>2</sup>                  |                                                 |                                                |
|----------------------------------|-----------|--------------------------|--------------|--------------------------------------------------|-------------------------------------------------|------------------------------------------------|
|                                  |           |                          |              | Diaph2 <sup>+/ve</sup> Arp <sup>+/ve</sup> cells | Diaph2 <sup>+/ve</sup> Arp <sup>-ve</sup> cells | Diaph2 <sup>-ve</sup> Arp <sup>-ve</sup> cells |
| Rac GTPase-activating protein 1  | RACGAP 1  | Regulation of RhoGTPases | 71.026       | 9                                                | 10                                              | 2                                              |
| Rho GDP-dissociation inhibitor 2 | ARHGDI B  | Regulation of RhoGTPases | 22.988       | 5                                                | 4                                               | 4                                              |

<sup>1</sup>Alternative names are given in parentheses

<sup>2</sup>Proteins with 2 or more peptides were considered valid hits

Table S6. Fold change in the levels of cellular proteins detected in virion preparations from Diaph2<sup>-ve</sup>Arp<sup>+/ve</sup> cells and Diaph2<sup>-ve</sup>Arp<sup>-ve</sup> cells relative to Diaph2<sup>+/ve</sup>Arp<sup>+/ve</sup> cells.

| Protein name <sup>1</sup>                   | Fold Change (relative to Diaph2 <sup>+/ve</sup> Arp <sup>+/ve</sup> ) <sup>2</sup> |                                          |
|---------------------------------------------|------------------------------------------------------------------------------------|------------------------------------------|
|                                             | Diaph2 <sup>-ve</sup> Arp <sup>+/ve</sup>                                          | Diaph2 <sup>-ve</sup> Arp <sup>-ve</sup> |
| Villin-1                                    | ND                                                                                 | ND                                       |
| Cadherin-2                                  | ND                                                                                 | ND                                       |
| Cadherin-6                                  | ND                                                                                 | ND                                       |
| Junction plakoglobin                        | ND                                                                                 | ND                                       |
| Ezrin                                       | 0.426869319                                                                        | 0.775834415                              |
| Integrin alpha-X                            | 0.594352604                                                                        | ND                                       |
| F-actin-capping protein subunit beta        | 0.664438528                                                                        | 0.997147476                              |
| Integrin alpha-M (CD11b)                    | 0.70278725                                                                         | 0.318636027                              |
| Profilin                                    | 0.729396153                                                                        | 0.423568972                              |
| Integrin alpha-L (CD11a)                    | 0.775366489                                                                        | 0.641602058                              |
| Actin-related protein 2/3 complex subunit 3 | 0.78379315                                                                         | ND                                       |
| Macrophage-capping protein                  | 0.82027724                                                                         | 0.472195358                              |
| CD44 antigen                                | 0.827739842                                                                        | 0.850743377                              |
| Intercellular adhesion molecule 1           | 0.865094017                                                                        | 1.282666667                              |
| Actin-related protein 2/3 complex subunit 2 | 0.886295503                                                                        | ND                                       |
| Rac GTPase-activating protein 1             | 0.891894534                                                                        | 0.144910863                              |
| CD97 antigen                                | 0.89546113                                                                         | ND                                       |

|                                                           |             |             |
|-----------------------------------------------------------|-------------|-------------|
| Cadherin-13                                               | 0.907164703 | 1.087725548 |
| Talin-1                                                   | 0.917354722 | 0.906555529 |
| Ras GTPase-activating-like<br>protein IQGAP1              | 0.921946106 | 1.03400317  |
| Platelet endothelial cell adhesion<br>molecule            | 0.941177775 | 0.137107002 |
| Alpha-actinin-1                                           | 0.943789847 | 0.960939391 |
| Integrin alpha-4                                          | 0.954788728 | ND          |
| Integrin beta                                             | 0.990104053 | 1.023757549 |
| FilaminA                                                  | 1.033951235 | 1.148007379 |
| Pyruvate kinase                                           | 1.084727918 | 1.312756289 |
| Transforming growth factor-beta-<br>induced protein ig-h3 | 1.098560722 | 1.004211713 |
| F-actin-capping protein subunit<br>alpha-1                | 1.134261145 | ND          |



| Protein name <sup>1</sup>                               | Fold Change (relative to Diaph2 <sup>+ve</sup> Arp <sup>+ve</sup> ) <sup>2</sup> |                                          |
|---------------------------------------------------------|----------------------------------------------------------------------------------|------------------------------------------|
|                                                         | Diaph2 <sup>-ve</sup> Arp <sup>+ve</sup>                                         | Diaph2 <sup>-ve</sup> Arp <sup>-ve</sup> |
| Ras-related C3 botulinum toxin substrate 1 (Rac1)       | 1.147066448                                                                      | 1.210101097                              |
| Moesin                                                  | 1.20691883                                                                       | 1.678873488                              |
| Vinculin                                                | 1.229865447                                                                      | 0.933886541                              |
| Rho GDP-dissociation inhibitor 2                        | 1.32454502                                                                       | 0.850584198                              |
| Guanine nucleotide-binding protein G(i) subunit alpha-2 | 1.331356723                                                                      | 0.952451546                              |
| Integrin alpha-6                                        | 1.338333706                                                                      | 1.306515412                              |
| C-type lectin domain family 2 member B                  | 1.494409642                                                                      | 1.392593767                              |
| ARP2 actin-related protein 2 homolog                    | 1.564918357                                                                      | ND                                       |
| Cell division control protein 42 homolog (Cdc42)        | 1.681728101                                                                      | 1.028193949                              |
| Transforming protein RhoA                               | 1.739662389                                                                      | 0.991720712                              |
| Integrin alpha-5                                        | 2.195967025                                                                      | 1.822671216                              |

<sup>1</sup>Alternative names are given in parentheses

<sup>2</sup>Fold change was calculated as the ratio of MaxQuant LFQ intensities of peptides observed in virion preparations from mutant cell lines over preparations from Diaph2<sup>+ve</sup>Arp<sup>+ve</sup> cells
